# Supplementary material for: Fatty Acid Binding Protein 5 Mediates Cell Death by Psychosine Exposure through Mitochondrial Macropores Formation in Oligodendrocytes
Source: MDPI journal article supplement (doi:10.3390/biomedicines8120635), 2020-12-20
Supplement: s1 [file s1]

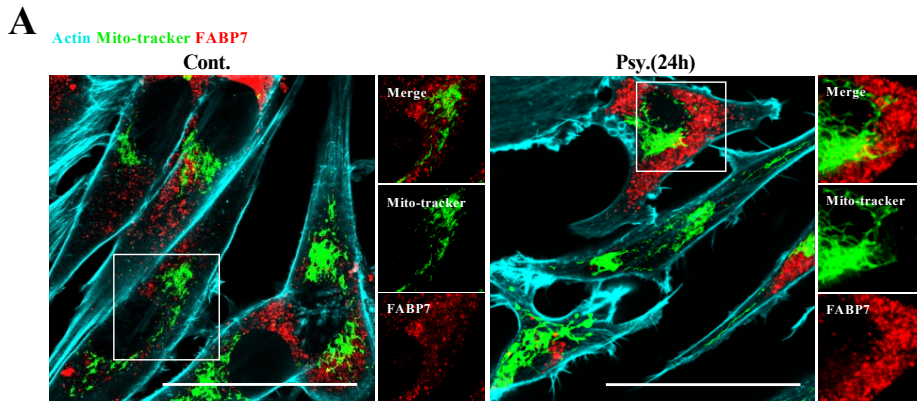

Figure S1: FABP7 does not localize in mitochondria, even when treated with psychosine. (A) Confocal microscopy of FABP7 (red), Mito-tracker (green), and actin (cyan), showed no co-localization of FABP7 with mitochondria. Scale bar=50 $\mu$ m.

# H

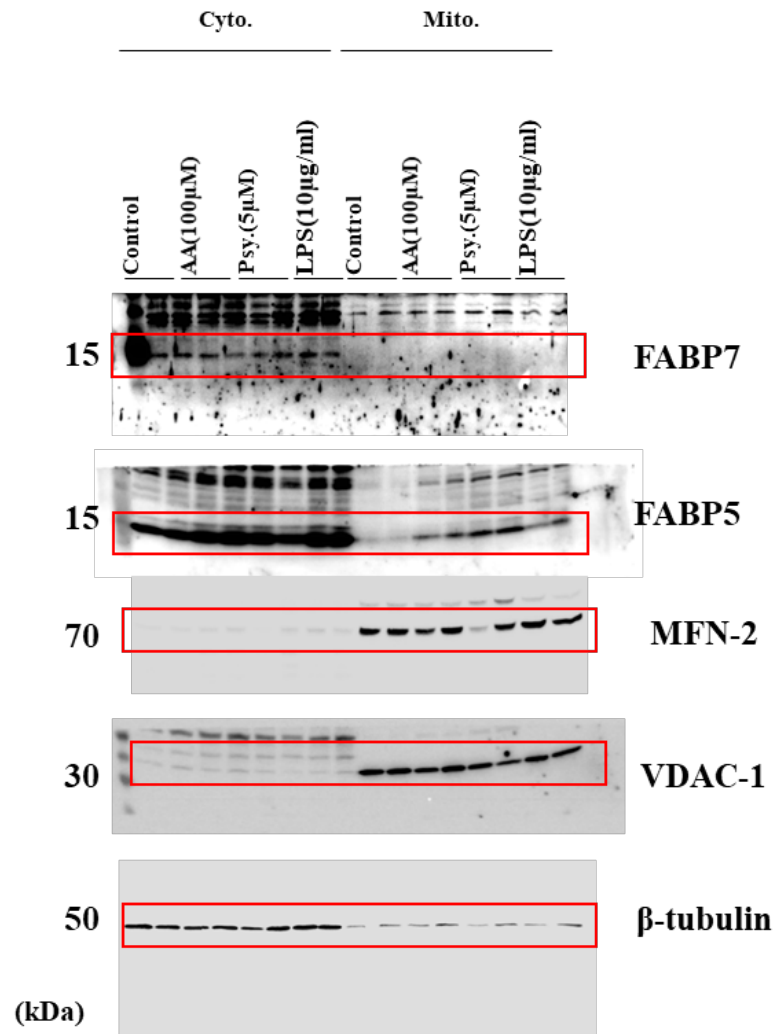

Figure 1— Original image 1

**A****Mitochondrial fraction**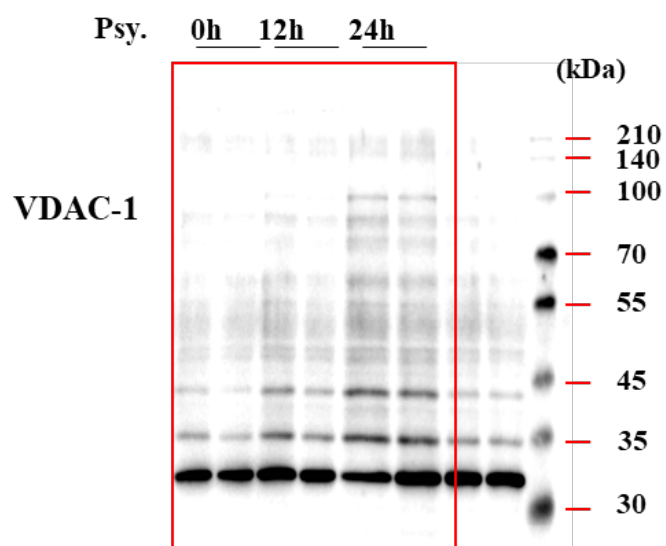**C**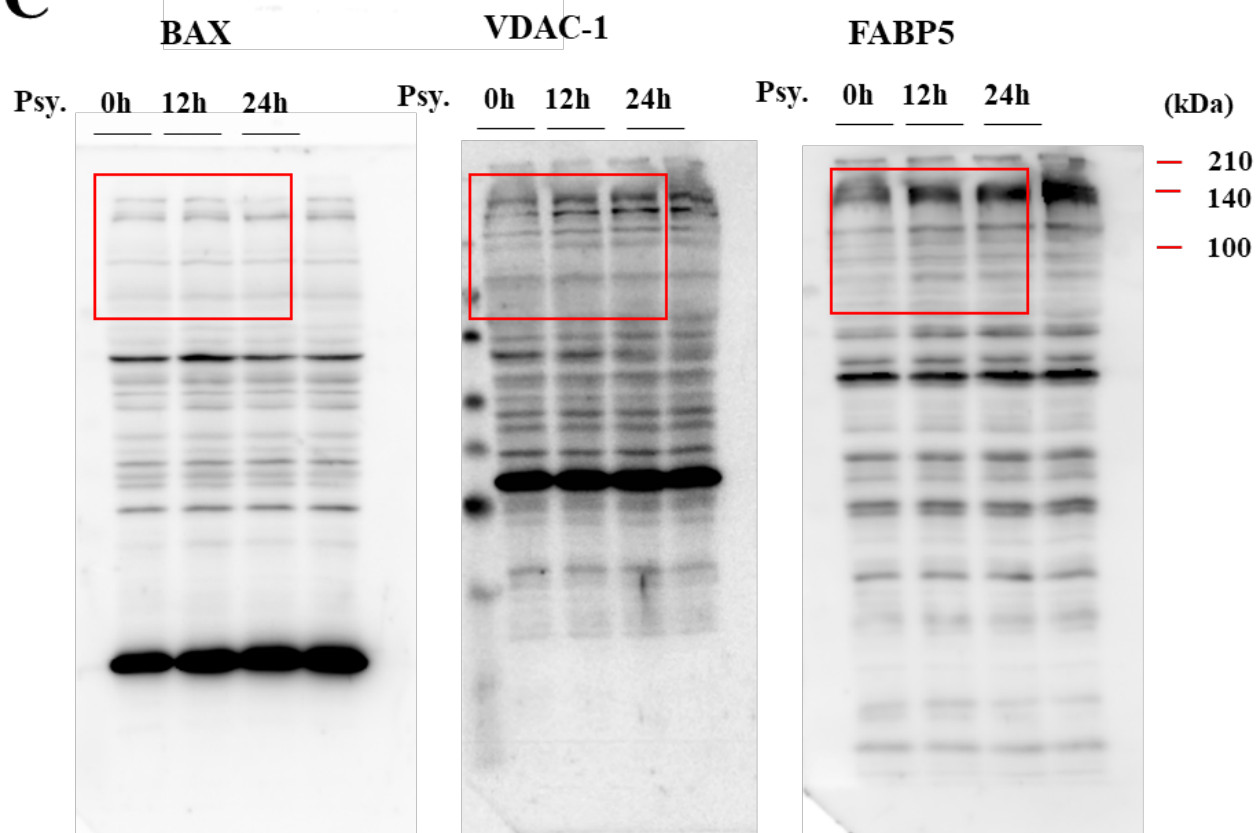

Figure 3—Original image 1

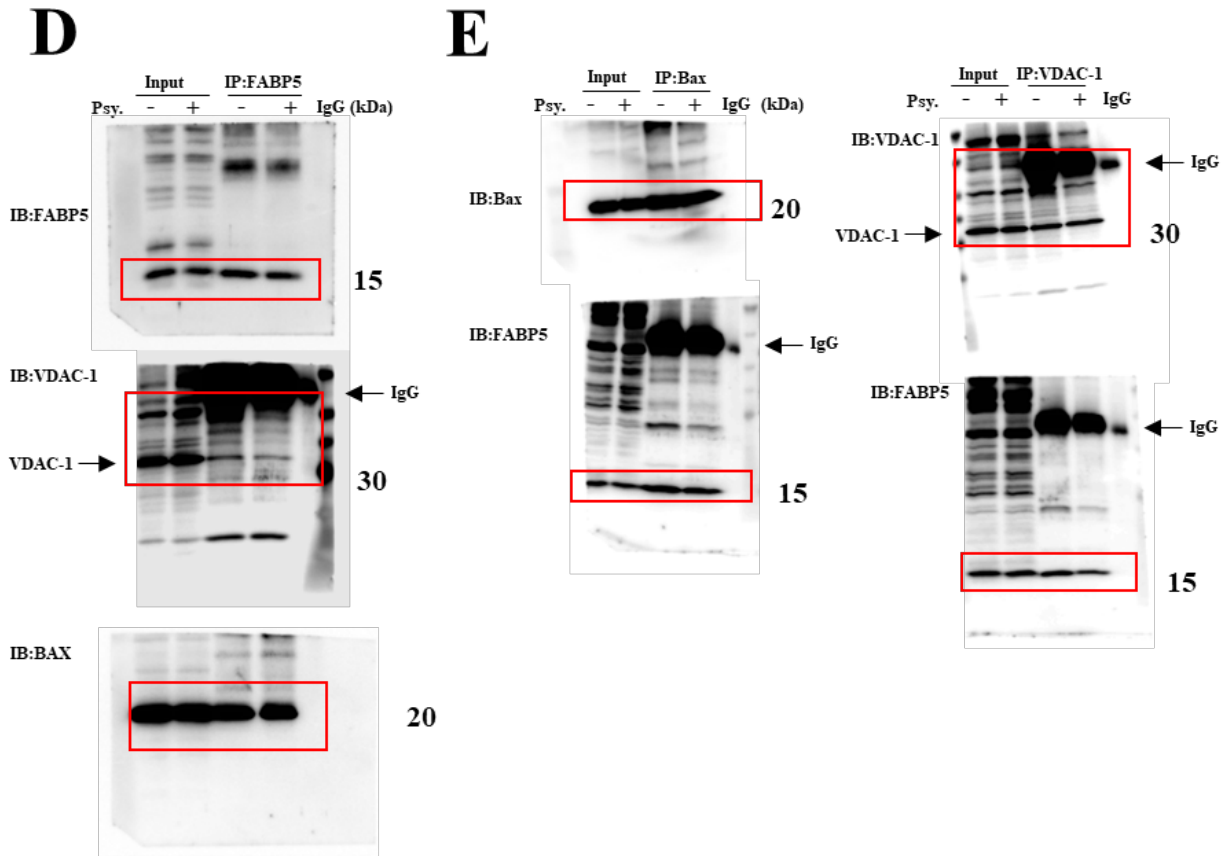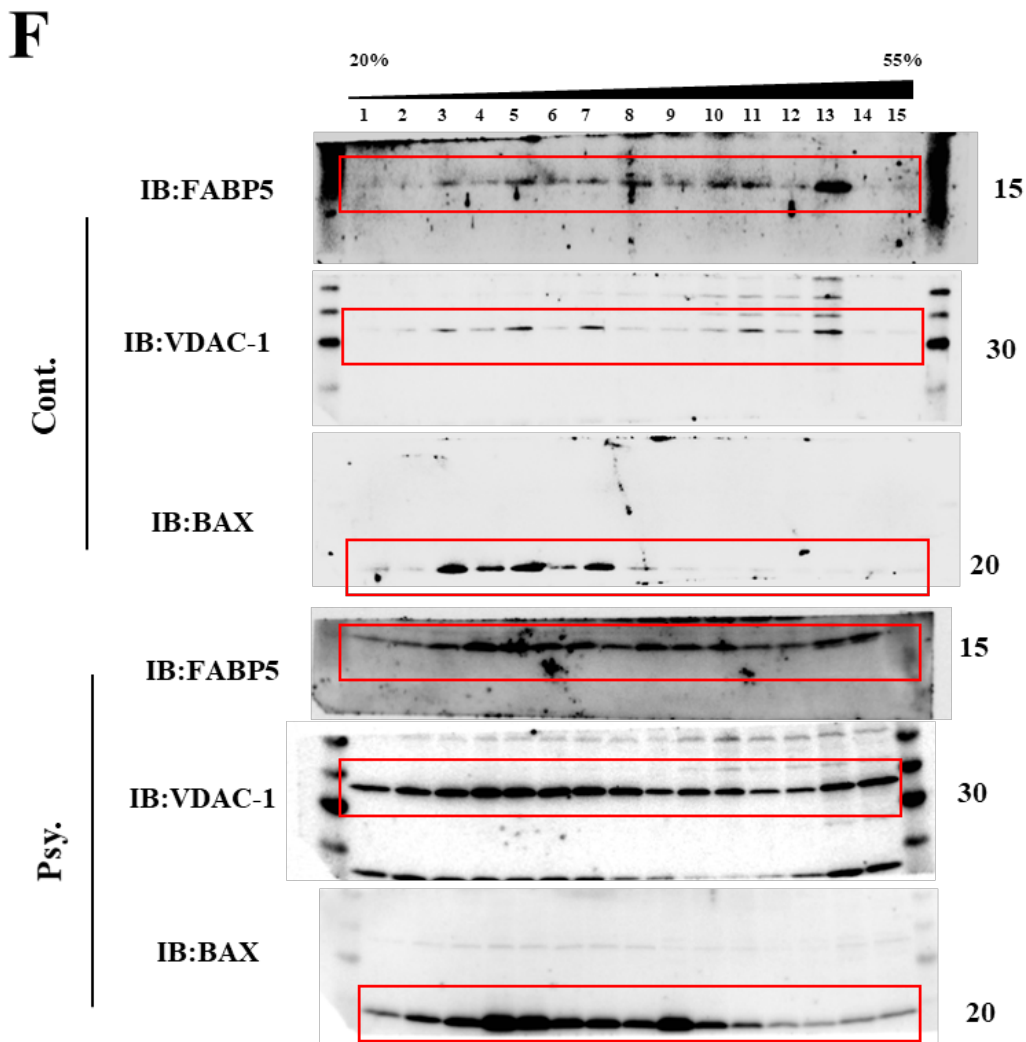

Figure 3—Original image 2

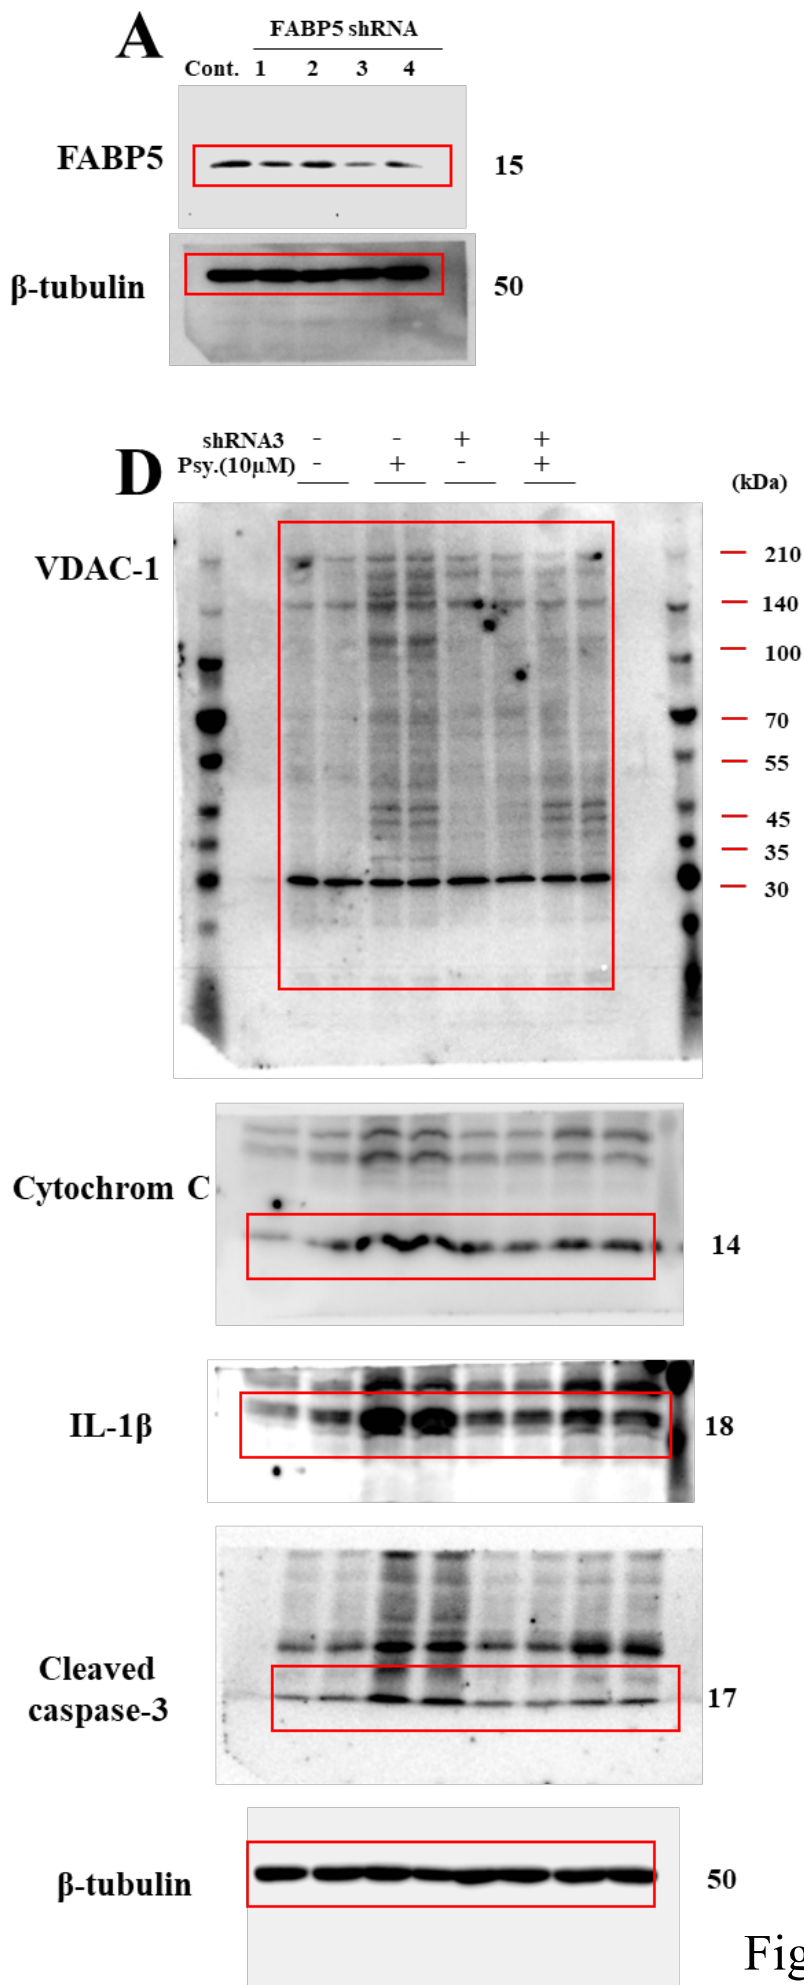

Figure 4—Original image

**E**

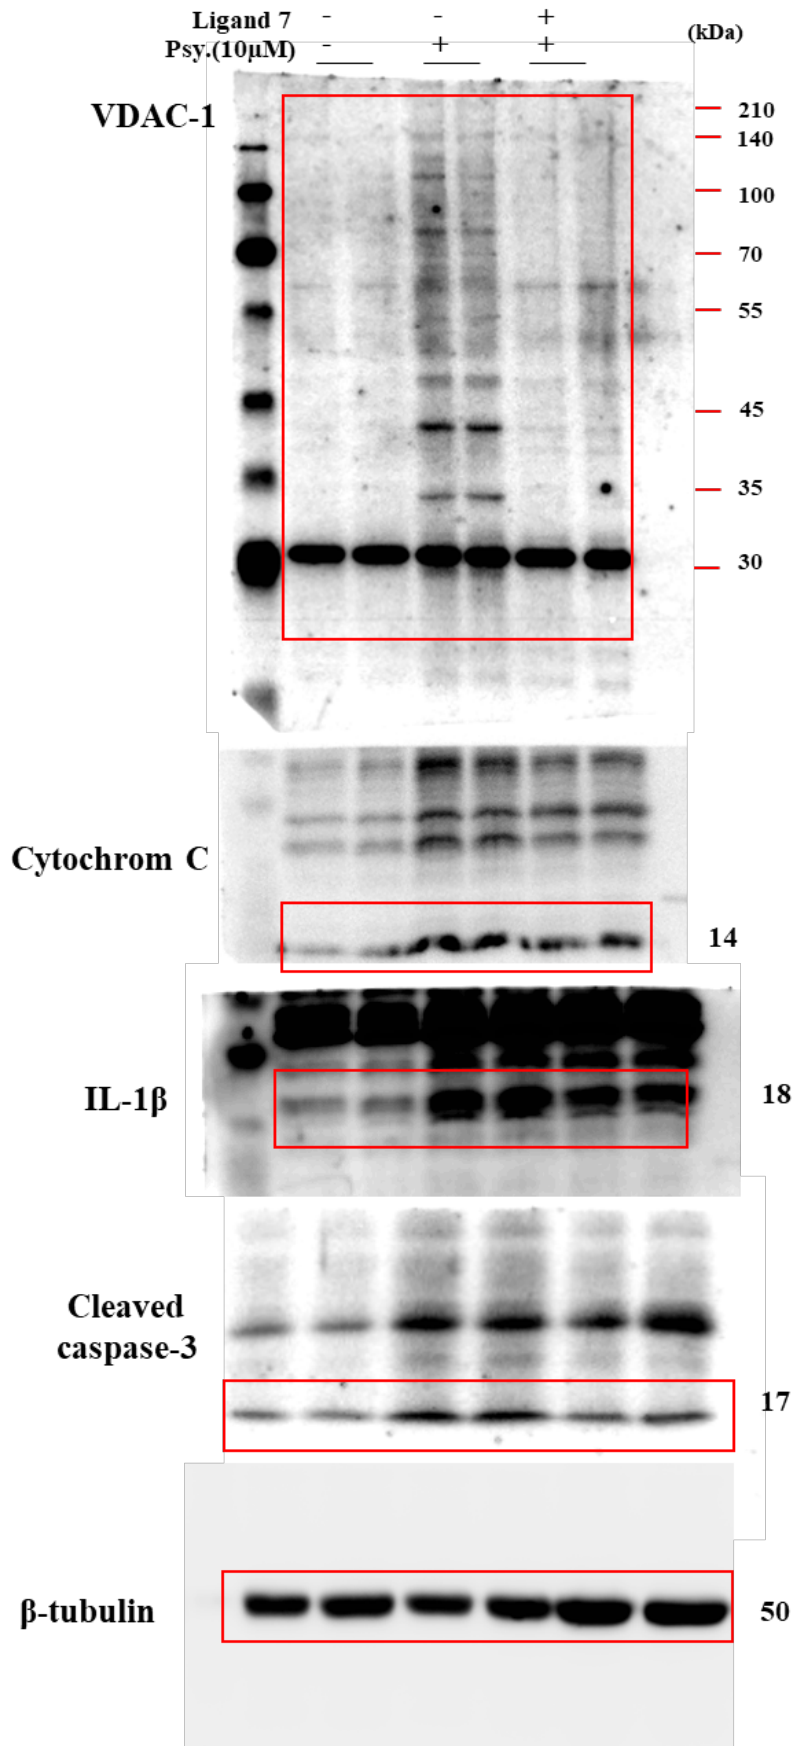

Figure 5—Original image
